# Supplementary material
Source: PubMed Central journal article supplement (PMC11027652)
Supplement: 262_2020_2549_MOESM1_ESM.pdf [file 262_2020_2549_MOESM1_ESM.pdf]

**a. Total TILs: RFS**

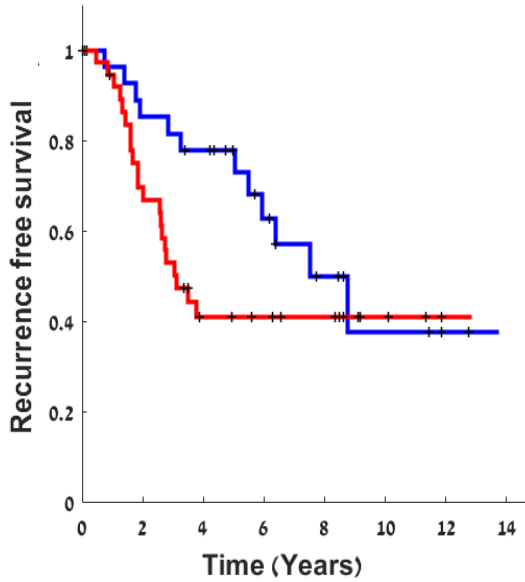

■ Pos. Total TIL levels (>5%) n=29  
■ Low Total TIL levels (<=5%) n=41  
**p = 0.19**

**b. TNFR2+ TILs: RFS**

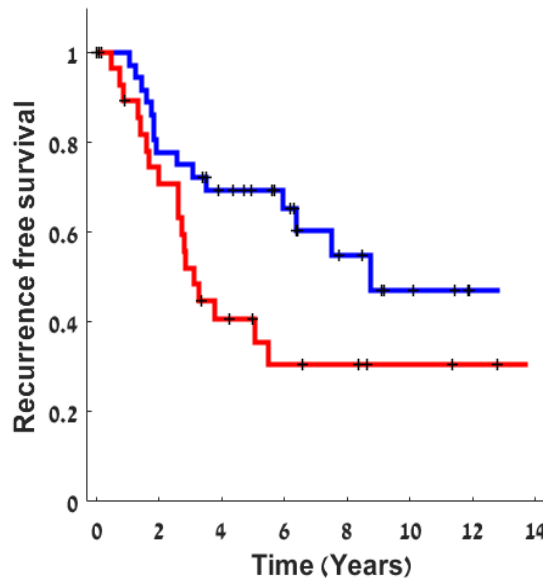

■ Pos. TNFR2+ TILs (>5%) n=40  
■ Low TNFR2+ TILs (<=5%) n=30  
**p = 0.053**

**c. PD-1+ TILs: RFS**

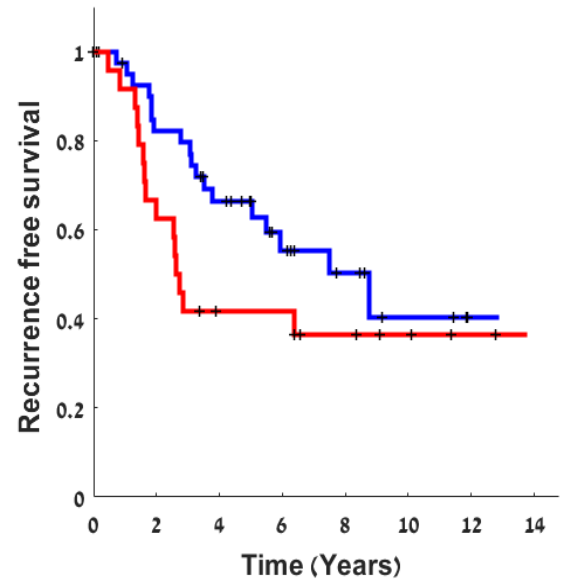

■ Pos. PD-1+ TILs (>5 in HS) n=44  
■ Low PD-1+ TILs (<=5 in HS) n=26  
**p = 0.15**

**Recurrence-free survival plots of Total TILs, TNFR+ TILs and PD-1+ TILs**

The Figure demonstrates RFS Kaplan-Meier plots of **(a)** Total TIL levels, **(b)** TNFR2+ TILs and **(c)** PD-1+ TILs in the cohort.

+, Censored. Pos, Positive; HS, Hotspot. P values are provided in the Figure.
